# Supplementary material for: Manipulating Ru oxidation within electrospun carbon nanofibers to boost hydrogen and oxygen evolution for electrochemical overall water splitting
Source: Royal Society of Chemistry journal article supplement (doi:10.1039/d2qi01168a), 2022-01-01
Supplement: d2qi01168a1.pdf [file d2qi01168a1.pdf]

# **Manipulating Ru Oxidation within Electrospun Carbon Nanofibers to Boost Hydrogen and Oxygen Evolution for Electrochemical Overall Water Splitting**

Mengxiao Zhong, Su Yan, Jiaqi Xu, Ce Wang, Xiaofeng Lu\*

Alan G. MacDiarmid Institute, College of Chemistry, Jilin University, 2699 Qianjin Street, Changchun 130012, P. R. China.

\*Corresponding author.

*Email address:* xflu@jlu.edu.cn (Prof. X. Lu)

### Measurements of the calibration of Hg/HgO electrode

The Hg/HgO electrode as the reference electrode was calibrated by a relatively steady state chronoamperometry method in H<sub>2</sub>-saturated 1 M KOH. Two polished Pt foils with the same area served as working electrode and counter electrode to form a three-electrode system. A series of chronoamperometry curves were measured for 300 s to get the current interconvert between the hydrogen oxidation and hydrogen evolution reaction. The potential at zero net current was obtained from the figure plotting the currents at 300 s with the corresponding applied potentials. In this study, the potential of zero net current was found at -0.928 V vs. Hg/HgO (Fig. S1). Therefore, the potentials were transferred to reversible hydrogen electrode (RHE) via the Nernst equation:  $E_{\text{RHE}} = E_{\text{Hg/HgO}} + 0.928 \text{ V}$ .

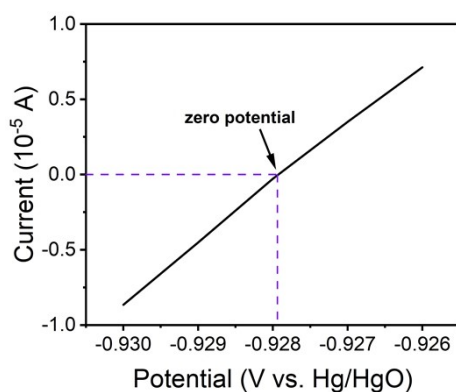

**Fig. S1** The current as a function of the applied potentials for the calibration of Hg/HgO reference electrode.

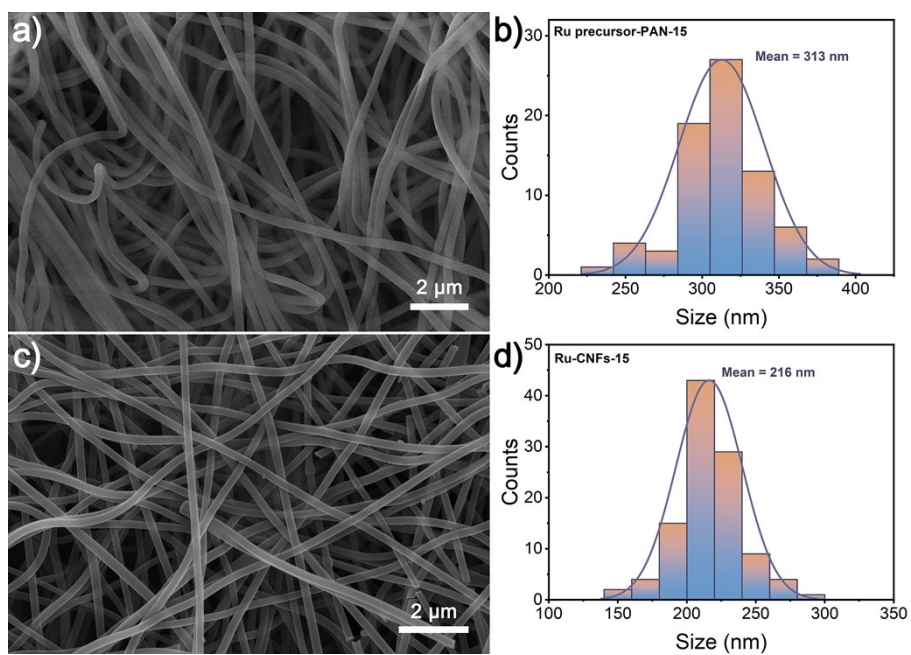

**Fig. S2** SEM images of (a) Ru precursor-PAN-15 and (c) Ru-CNFs-15. Statistic histograms of the diameter distribution of (b) Ru precursor-PAN-15 and (d) Ru-CNFs-15.

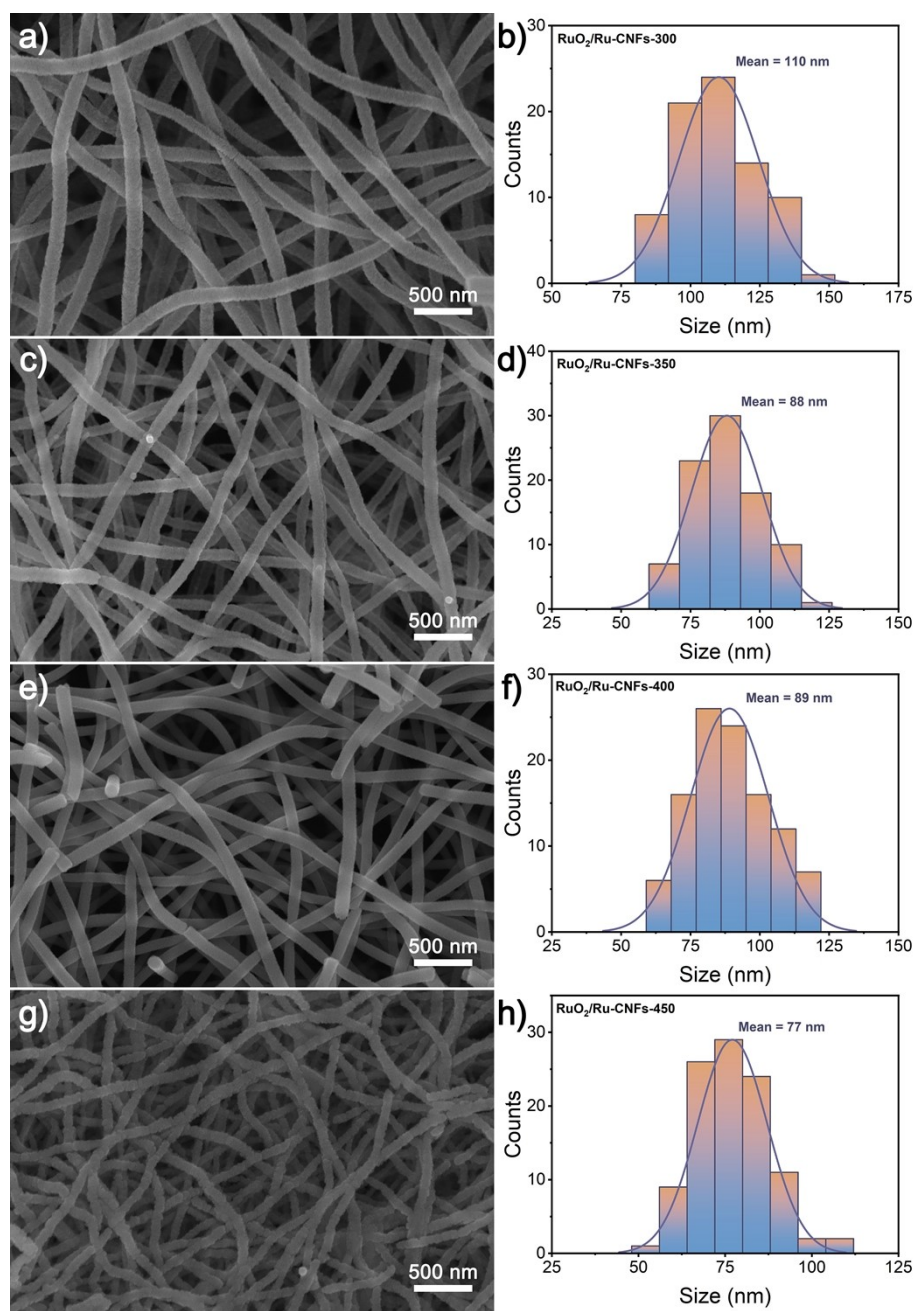

**Fig. S3** SEM images of (a) RuO<sub>2</sub>/Ru-CNFs-300, (c) RuO<sub>2</sub>/Ru-CNFs-350, (e) RuO<sub>2</sub>/Ru-CNFs-400 and (g) RuO<sub>2</sub>/Ru-CNFs-450. Statistic histograms of the diameter distribution of (b) RuO<sub>2</sub>/Ru-CNFs-300, (d) RuO<sub>2</sub>/Ru-CNFs-350, (f) RuO<sub>2</sub>/Ru-CNFs-400 and (h) RuO<sub>2</sub>/Ru-CNFs-450.

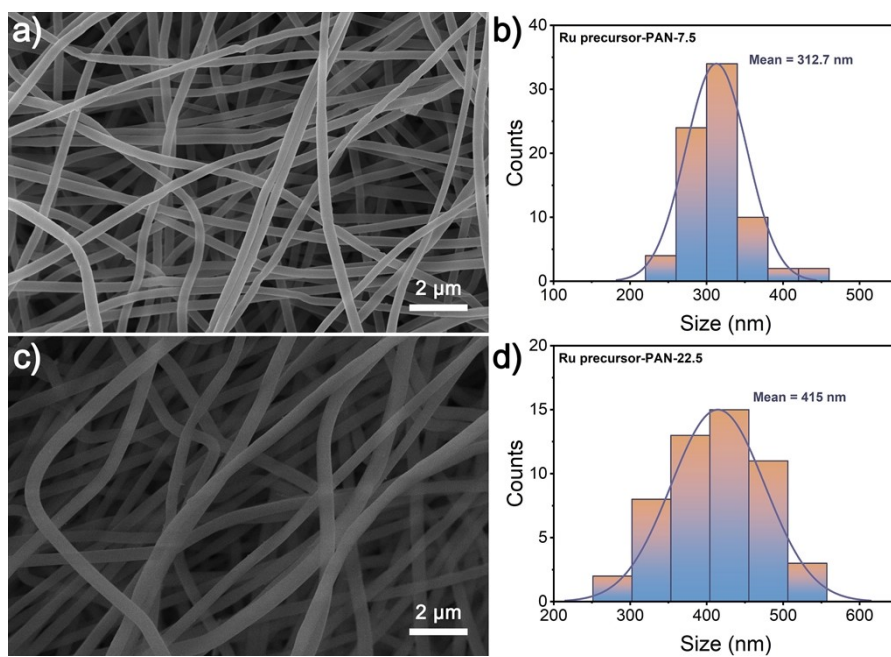

**Fig. S4** SEM images of (a) Ru precursor-PAN-7.5 and (c) Ru precursor-PAN-22.5. Statistic histograms of the diameter distribution of (b) Ru precursor-PAN-7.5 and (d) Ru precursor-PAN-22.5.

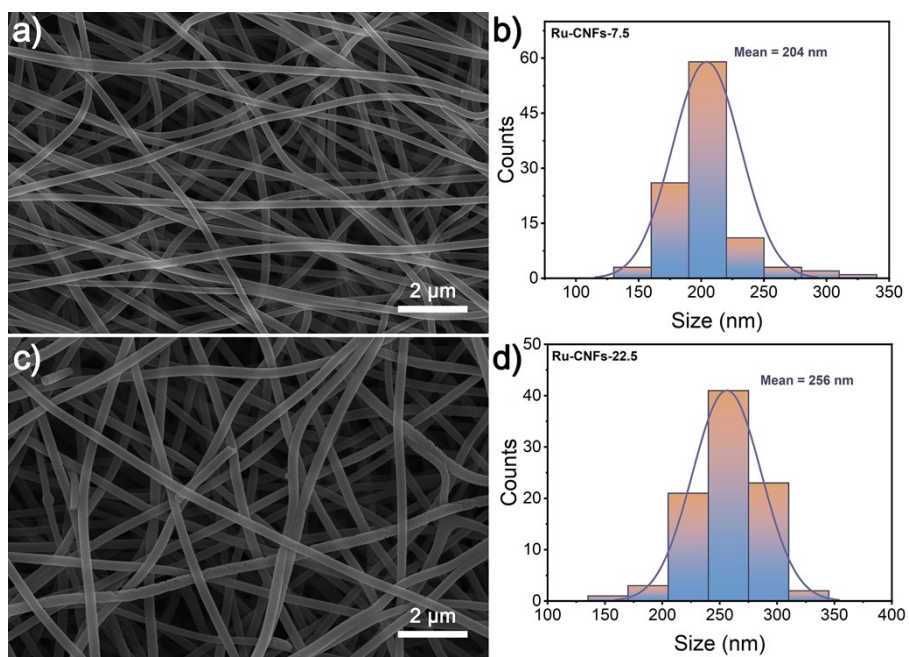

**Fig. S5** SEM images of (a) Ru-CNFs-7.5 and (c) Ru-CNFs-22.5. Statistic histograms of the diameter distribution of (b) Ru-CNFs-7.5 and (d) Ru-CNFs-22.5.

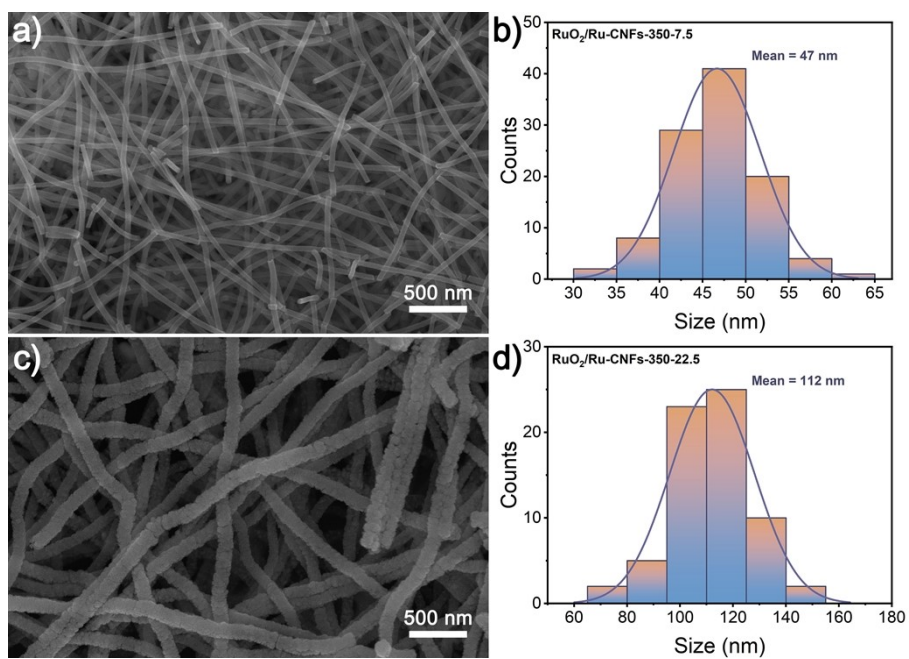

**Fig. S6** SEM images of (a) RuO<sub>2</sub>/Ru-CNFs-350-7.5 and (c) RuO<sub>2</sub>/Ru-CNFs-350-22.5. Statistic histograms of the diameter distribution of (b) RuO<sub>2</sub>/Ru-CNFs-350-7.5 and (d) RuO<sub>2</sub>/Ru-CNFs-350-22.5.

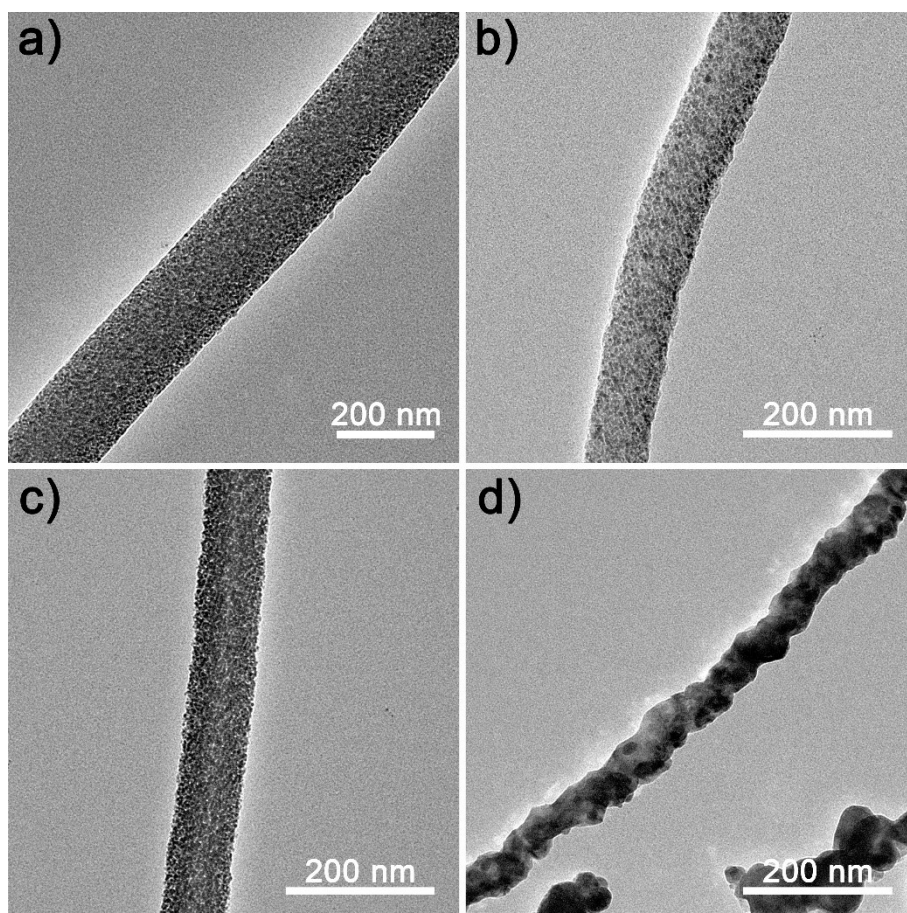

**Fig. S7** TEM images of (a) Ru-CNFs-15, (b) RuO<sub>2</sub>/Ru-CNFs-300, (c) RuO<sub>2</sub>/Ru-CNFs-400 and (d) RuO<sub>2</sub>/Ru-CNFs-450.



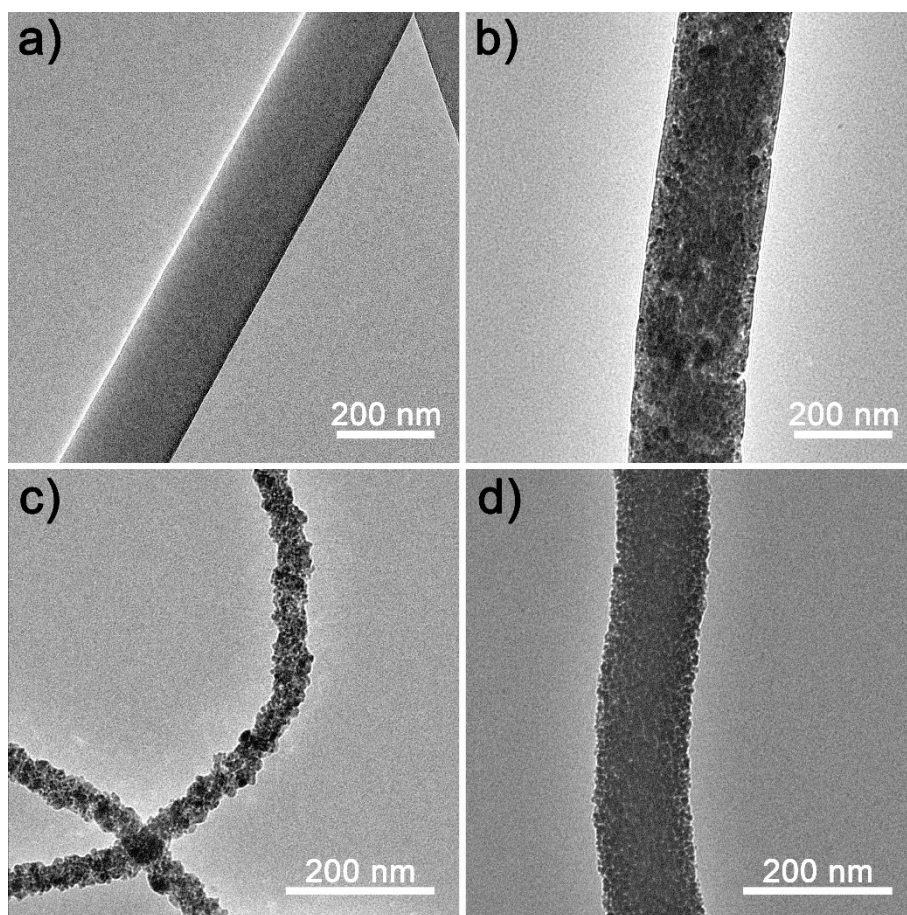

**Fig. S8** TEM images of (a) Ru-CNFs-7.5 and (b) Ru-CNFs-22.5, (c) RuO<sub>2</sub>/Ru-CNFs-350-7.5 and (d) RuO<sub>2</sub>/Ru-CNFs-350-22.5.

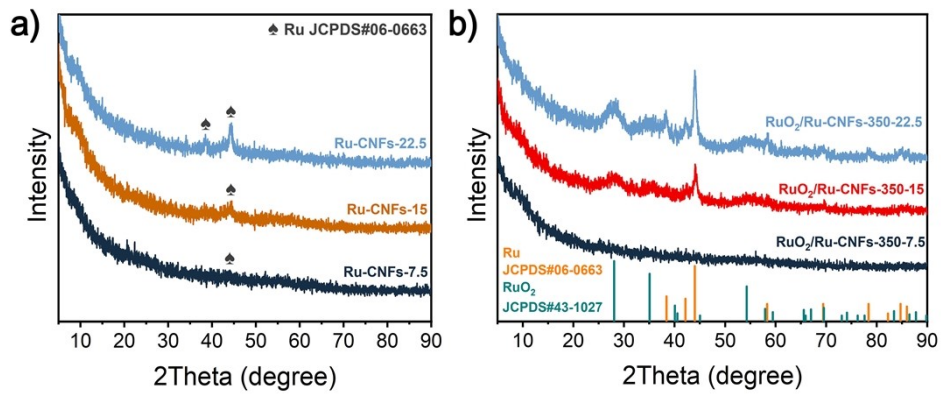

**Fig. S9** (a) XRD patterns of Ru-CNFs-7.5, Ru-CNFs-15 and Ru-CNFs-22.5. (b) XRD patterns of RuO<sub>2</sub>/Ru-CNFs-350-7.5, RuO<sub>2</sub>/Ru-CNFs-350-15 and RuO<sub>2</sub>/Ru-CNFs-350-22.5.

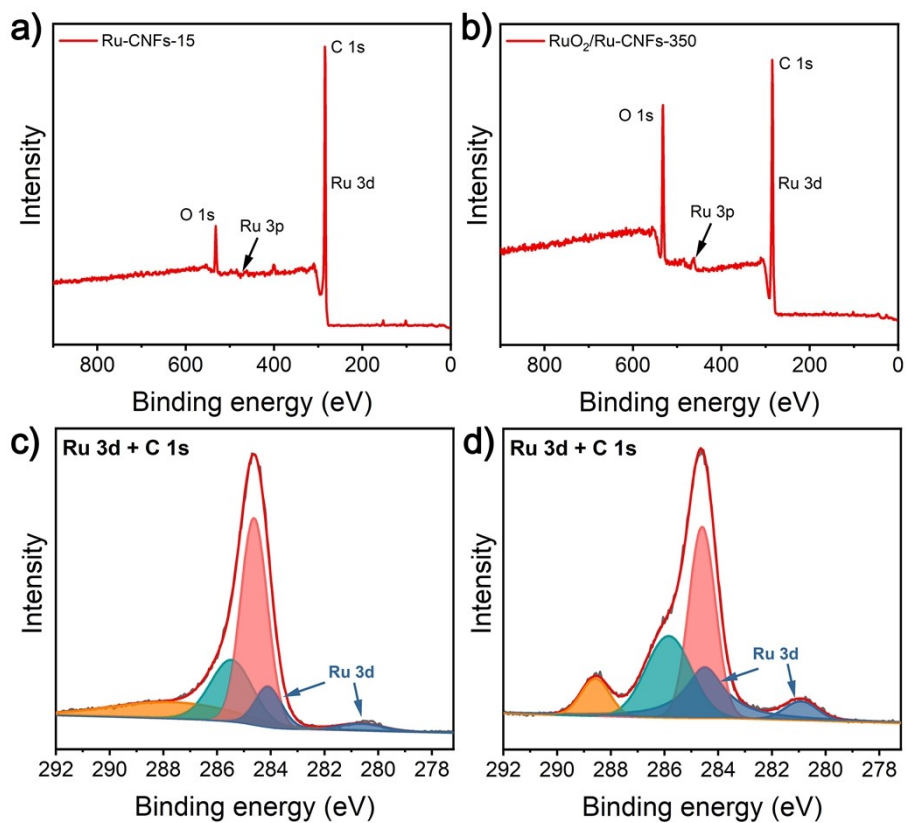

**Fig. S10** (a) Full survey and (c) narrow-scan XPS spectrum of Ru-CNFs-15. (b) Full survey and (d) narrow-scan XPS spectrum of RuO<sub>2</sub>/Ru-CNFs-350.

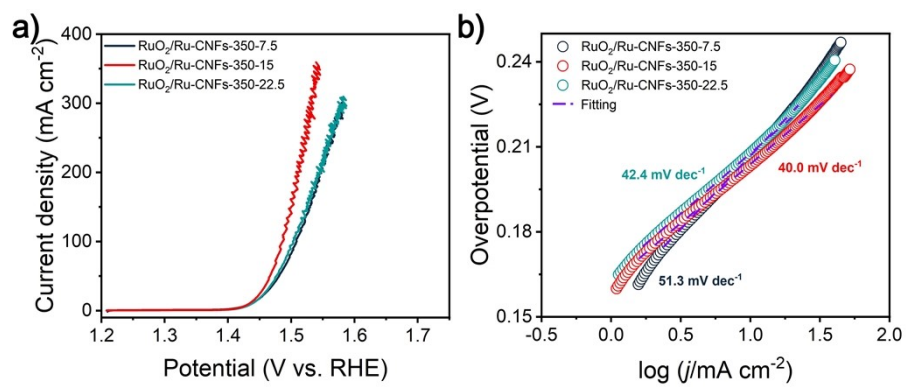

**Fig. S11** (a) Polarization curves and (b) Tafel plots of different RuO<sub>2</sub>/Ru-CNFs catalysts for OER in 1 M KOH.

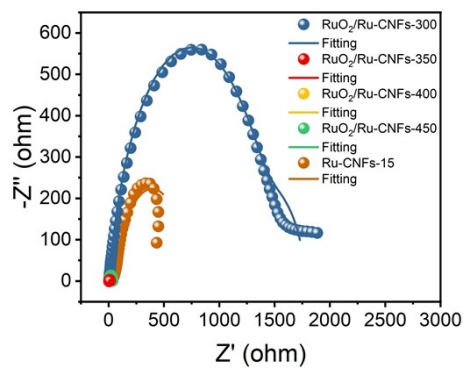

**Fig. S12** Nyquist plots of different catalysts for OER. The dots and lines represent the experimental and fitting data, respectively.

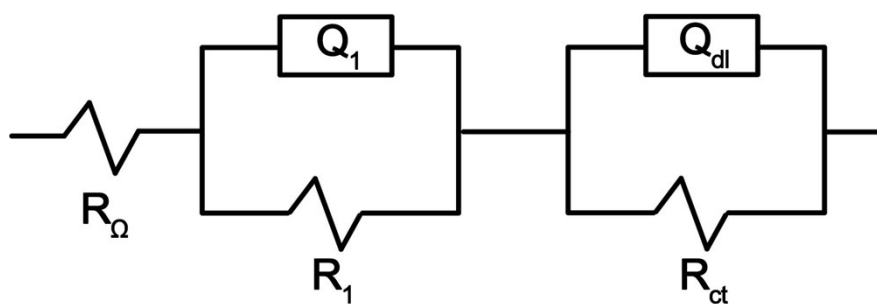

**Fig. S13** The equivalent circuit model of electrodes.  $R_{\Omega}$  is cell resistance including the connections, the electrolyte, and oxide deposit resistance;  $R_{ct}$  is the charge transfer resistance;  $R_1$  is the contact resistance between the catalyst and electrode,  $Q_1$  and  $Q_{dl}$  are the signs of the constant phase element and the double-layer capacitance, respectively.

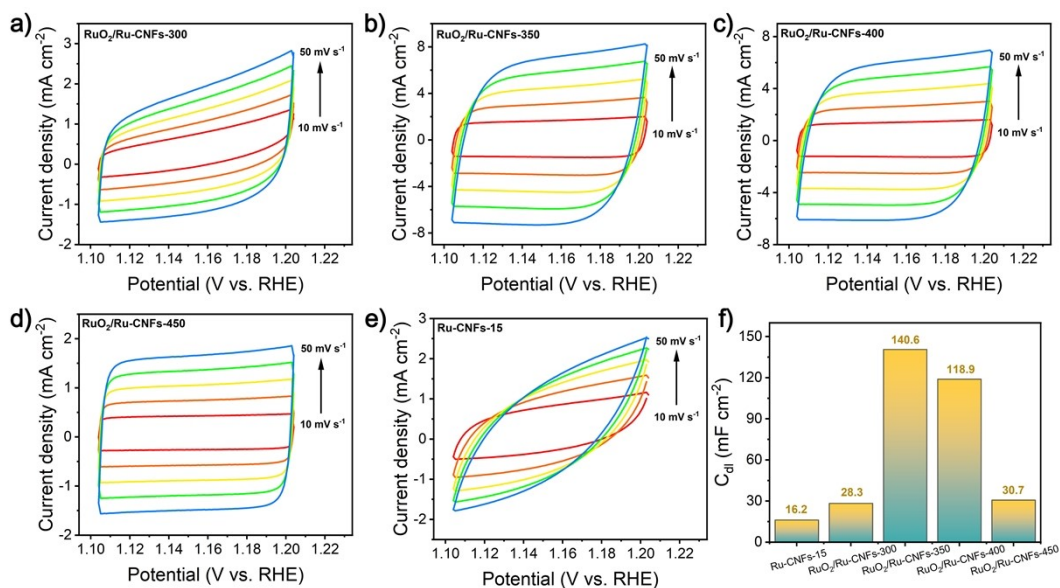

**Fig. S14** CV curves with different scan rates from 10 to 50  $\text{mV s}^{-1}$  in the region of 1.104-1.204 V vs. RHE for (a) RuO<sub>2</sub>/Ru-CNFs-300, (b) RuO<sub>2</sub>/Ru-CNFs-350, (c) RuO<sub>2</sub>/Ru-CNFs-400, (d) RuO<sub>2</sub>/Ru-CNFs-450 and (e) Ru-CNFs-15, respectively. (f) C<sub>dl</sub> values of different catalysts.

### Estimation of ECSA

The ECSA value was evaluated from the double layer capacitance ( $C_{dl}$ ), which was determined by a CV method. The CV measurements were proceeded in a potential range of 1.104-1.204 V vs. RHE (with no Faradic responses) at different scan rates of 10, 20, 30, 40 and 50  $\text{mV s}^{-1}$ . Then,  $C_{dl}$  values were calculated by plotting capacitive current density  $\Delta j$  ( $j_{\text{anode}} - j_{\text{cathode}}$ , acquired from the corresponding CV curves) at 1.154 V vs. RHE versus scan rate, and the linear slope value is twice to the  $C_{dl}$ . Thus, the ECSA values can be estimated according to the following equation:  $\text{ECSA} = (C_{dl} \cdot S) / C_s$ , where S is the the geometric area of the working electrode and  $C_s$  is the specific capacitance of a smooth surface (generally assumed to be 0.04  $\text{mF cm}^{-2}$  based on literatures).<sup>1-4</sup>

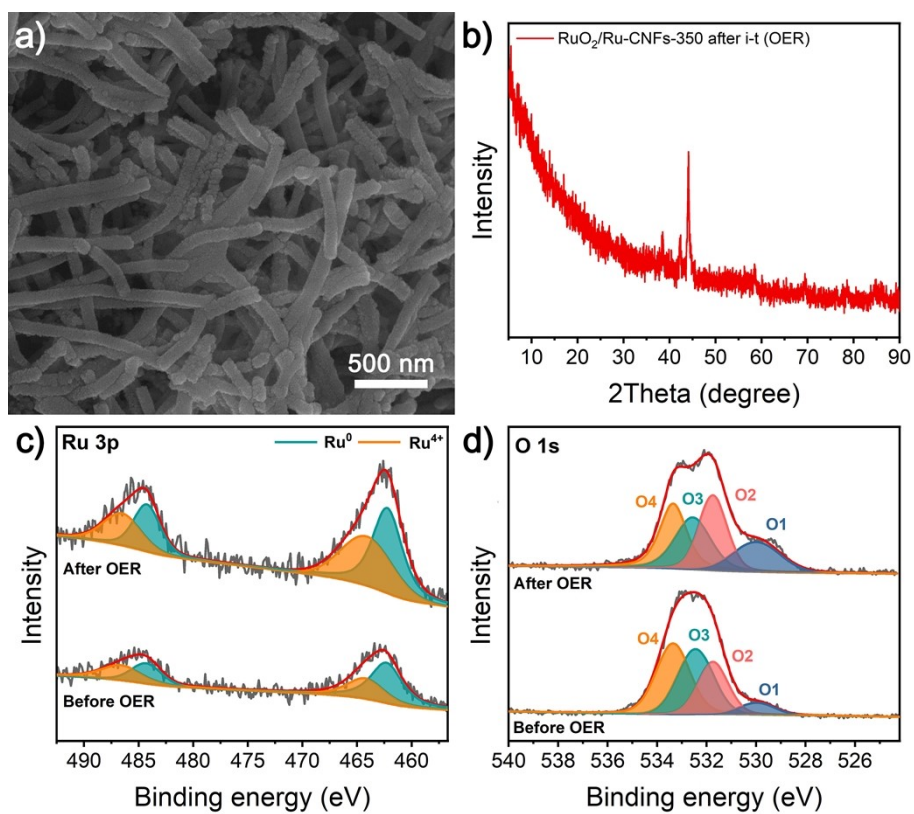

**Fig. S15** (a) SEM image, (b) XRD pattern, and narrow-scan XPS spectra of (c) Ru 3p and (d) O 1s of RuO<sub>2</sub>/Ru-CNFs-350 after the i-t measurement for OER.



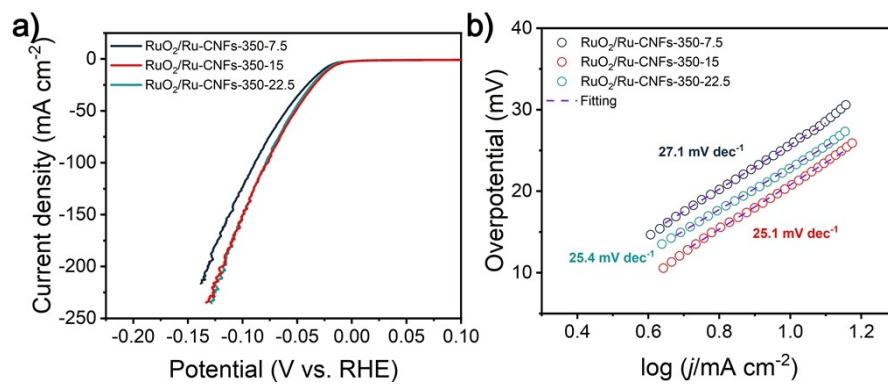

**Fig. S16** (a) Polarization curves and (b) Tafel plots of different RuO<sub>2</sub>/Ru-CNFs catalysts for HER in 1 M KOH.

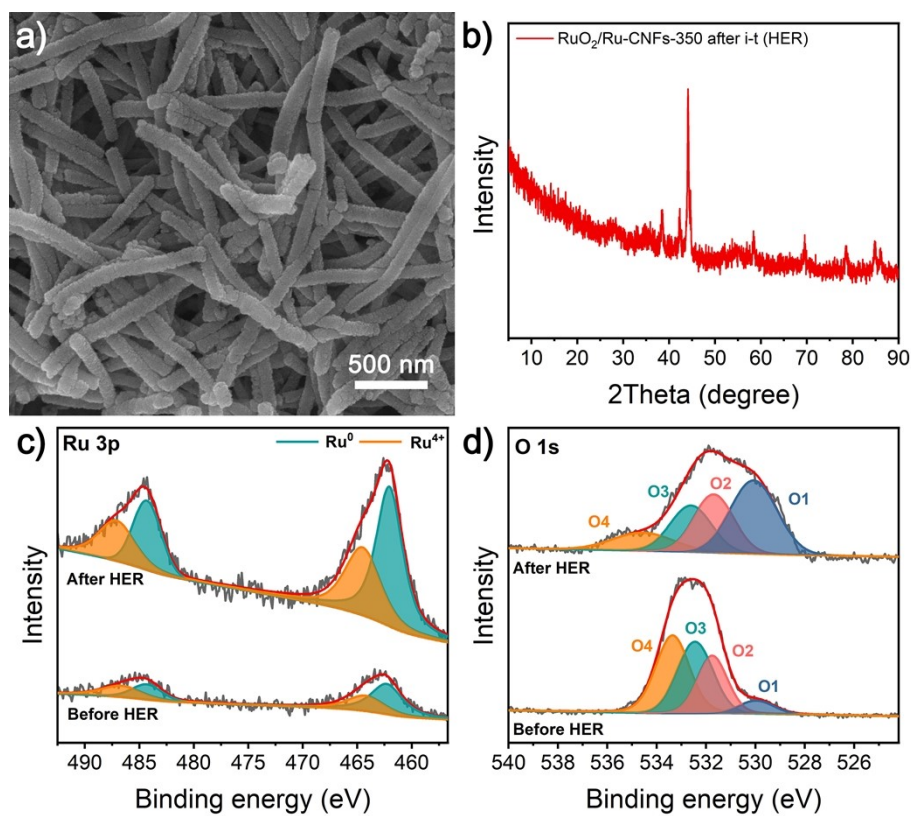

**Fig. S17** (a) SEM image, (b) XRD pattern, and narrow-scan XPS spectra of (c) Ru 3p and (d) O 1s of RuO<sub>2</sub>/Ru-CNFs-350 after the i-t measurement for HER.

**Table S1** Comparison of some representative catalysts for OER properties in 1 M KOH.

| Sample                                                          | Substrate           | $j$ (mA cm <sup>-2</sup> ) | $\eta$ (mV) | Tafel slope (mV dec <sup>-1</sup> ) | Reference                                                   |
|-----------------------------------------------------------------|---------------------|----------------------------|-------------|-------------------------------------|-------------------------------------------------------------|
| RuO <sub>2</sub> /Ru-CNFs-350                                   | GCRDE <sup>a)</sup> | 10                         | 203         | 40.0                                | This work                                                   |
|                                                                 |                     | 100                        | 256         |                                     |                                                             |
|                                                                 |                     | 200                        | 280         |                                     |                                                             |
| Commercial RuO <sub>2</sub>                                     | GCRDE               | 10                         | 339         | 91.5                                | This work                                                   |
| Ru-CoV-LDH/NF                                                   | NF <sup>b)</sup>    | 10                         | 230         | 81.2                                | <i>ChemSusChem</i> 2021, <b>14</b> , 730.                   |
| RuO <sub>2</sub> @Zn <sub>3</sub> V <sub>3</sub> O <sub>8</sub> | CP <sup>c)</sup>    | 10                         | 228         | 46                                  | <i>ACS Appl. Mater. Interfaces</i> 2021, <b>13</b> , 54951. |
| RuTe <sub>2</sub> -400                                          | GCE <sup>d)</sup>   | 10                         | 275         | 53                                  | <i>Appl. Catal. B-Environ.</i> 2020, <b>278</b> , 119281.   |
| Ru-NiCoP/NF                                                     | NF                  | 20                         | 216         | 84.5                                | <i>Appl. Catal. B-Environ.</i> 2020, <b>279</b> , 119396.   |
|                                                                 |                     | 100                        | 285         |                                     |                                                             |
| RuO <sub>2</sub> /F-graphene                                    | GCE                 | 10                         | 239         | 56                                  | <i>Inorg. Chem. Front.</i> 2020, <b>7</b> , 2188.           |
| CoNiFe LDH/RuO <sub>2.1</sub>                                   | GCE                 | 10                         | 281         | 48.9                                | <i>ACS Appl. Mater. Interfaces</i> 2020, <b>12</b> , 33083. |
| NiTe@RuO <sub>2</sub>                                           | NF                  | 10                         | 274         | 65                                  | <i>Appl. Catal. B-Environ.</i> 2020, <b>272</b> , 118988.   |
| Ru-MnFe/NF                                                      | NF                  | 20                         | 262         | 75                                  | <i>Adv. Energy Mater.</i> 2020, <b>10</b> , 2000814.        |
| Ru-RuO <sub>2</sub> /CNT                                        | GCE                 | 10                         | 210         | 64                                  | <i>Nano Energy</i> 2019, <b>61</b> , 576.                   |
| 0.27-RuO <sub>2</sub> @C                                        | GRRDE <sup>e)</sup> | 10                         | 250         | 68                                  | <i>Nano Energy</i> 2019, <b>55</b> , 49.                    |
| RuCu NSs                                                        | GCE                 | 10                         | 234         | 41.2                                | <i>Angew. Chem. Int. Ed.</i> 2019, <b>58</b> , 13983.       |
| RuO <sub>2</sub> /NiO/NF                                        | NF                  | 10                         | 250         | 50.5                                | <i>Small</i> 2018, <b>14</b> , 1704073.                     |
| Ru NWs                                                          | GCE                 | 10                         | 224         | 46                                  | <i>Adv. Funct. Mater.</i> 2018, <b>28</b> , 1803722.        |
| Ru-RuP <sub>x</sub> -Co <sub>x</sub> P                          | GCE                 | 10                         | 291         | 85.4                                | <i>Nano Energy</i> 2018, <b>53</b> , 270.                   |
| Ru/Cu-doped RuO <sub>2</sub>                                    | GCE                 | 10                         | 204         | 56                                  | <i>Small</i> 2018, <b>41</b> , 1803009.                     |
| Cu-RuO <sub>2</sub>                                             | GCE                 | 10                         | 240         | NA                                  | <i>Adv. Mater.</i> 2018, <b>30</b> , 1801351.               |

<sup>a)</sup> Rotating disk electrode made of glassy carbon; <sup>b)</sup> Ni foam; <sup>c)</sup> Carbon paper; <sup>d)</sup> Glassy carbon electrode; <sup>e)</sup> Rotating ring disk electrode made of glassy carbon.

**Table S2** The fitting data of the EIS measurements of the RuO<sub>2</sub>/Ru-CNFs-350 catalyst with other prepared control samples for OER.

| <b>Sample</b>                 | <b>R<sub>Ω</sub> (Ω)</b> | <b>R<sub>ct</sub> (Ω)</b> |
|-------------------------------|--------------------------|---------------------------|
| Ru-CNFs-15                    | 5.99                     | 695.2                     |
| RuO <sub>2</sub> /Ru-CNFs-300 | 4.79                     | 1431                      |
| RuO <sub>2</sub> /Ru-CNFs-350 | 4.80                     | 6.37                      |
| RuO <sub>2</sub> /Ru-CNFs-400 | 4.82                     | 6.79                      |
| RuO <sub>2</sub> /Ru-CNFs-450 | 4.63                     | 29.05                     |

**Table S3** Comparison of the ECSA values of the RuO<sub>2</sub>/Ru-CNFs-350 catalyst with other prepared control samples.

| Sample                        | C <sub>dl</sub> (mF cm <sup>-2</sup> ) | ECSA (cm <sup>-2</sup> ) | RF <sup>a)</sup> |
|-------------------------------|----------------------------------------|--------------------------|------------------|
| Ru-CNFs-15                    | 16.17                                  | 79.23                    | 404.25           |
| RuO <sub>2</sub> /Ru-CNFs-300 | 28.3                                   | 138.67                   | 707.5            |
| RuO <sub>2</sub> /Ru-CNFs-350 | 140.6                                  | 688.94                   | 3515             |
| RuO <sub>2</sub> /Ru-CNFs-400 | 118.9                                  | 582.61                   | 2972.5           |
| RuO <sub>2</sub> /Ru-CNFs-450 | 30.7                                   | 150.43                   | 767.5            |

<sup>a)</sup> RF is the roughness factor calculated by taking the estimated ECSA and dividing by the geometric area of the electrode, 0.196 cm<sup>2</sup>.<sup>4</sup>

**Table S4** Comparison of some representative catalysts for HER properties in 1 M KOH.

| Sample                                | Substrate           | $j$ (mA cm <sup>-2</sup> ) | $\eta$ (mV) | Tafel slope (mV dec <sup>-1</sup> ) | Reference                                                  |
|---------------------------------------|---------------------|----------------------------|-------------|-------------------------------------|------------------------------------------------------------|
| RuO <sub>2</sub> /Ru-CNFs-350         | GCRDE <sup>a)</sup> | 10                         | 21          | 25.1                                | This work                                                  |
|                                       |                     | 50                         | 51          |                                     |                                                            |
|                                       |                     | 150                        | 99          |                                     |                                                            |
| Commercial Pt/C                       | GCRDE               | 10                         | 24          | 25                                  | This work                                                  |
| Ru-CoV-LDH/NF                         | NF <sup>b)</sup>    | 10                         | 32          | 36.4                                | <i>ChemSusChem</i> 2021, <b>14</b> , 730.                  |
| Ru/Co <sub>4</sub> N-CoF <sub>2</sub> | NF                  | 10                         | 53          | 144.1                               | <i>Chem. Eng. J.</i> 2021, <b>414</b> , 128865.            |
|                                       |                     | 100                        | 199         |                                     |                                                            |
| RuTe <sub>2</sub> -400                | GCE <sup>c)</sup>   | 10                         | 34          | 28                                  | <i>Appl. Catal. B: Environ.</i> 2020, <b>278</b> , 119281. |
| Ni <sub>5</sub> P <sub>4</sub> -Ru    | GCE                 | 10                         | 123         | 56.7                                | <i>Adv. Mater.</i> 2020, 1906972.                          |
|                                       | CC <sup>d)</sup>    |                            | 54          | 52                                  |                                                            |
| (Ru-Co)O <sub>x</sub> /CC             | CC                  | 10                         | 44.1        | 23.5                                | <i>Angew. Chem. Int. Ed.</i> 2020, <b>59</b> , 17219.      |
| RuO <sub>2</sub> /F-graphene          | GCE                 | 10                         | 49          | 31                                  | <i>Inorg. Chem. Front.</i> 2020, <b>7</b> , 2188.          |
| SA-Ru-MoS <sub>2</sub>                | GCE                 | 10                         | 76          | 21                                  | <i>Small Methods</i> 2019, <b>3</b> , 1900653.             |
| Ru/Ni(OH) <sub>2</sub> /NF            | NF                  | 10                         | 25          | 47                                  | <i>J. Mater. Chem. A</i> 2019, <b>7</b> , 11062.           |
| RuB <sub>2</sub>                      | GCE                 | 10                         | 28          | 28.7                                | <i>Adv. Energy Mater.</i> 2019, <b>9</b> , 1803369.        |
| Sr <sub>2</sub> RuO <sub>4</sub>      | GCRDE               | 10                         | 61          | 51                                  | <i>Nat. Commun.</i> 2019, <b>10</b> , 149.                 |
| Ru ND/C                               | GCE                 | 10                         | 43.4        | 49                                  | <i>Chem. Commun.</i> 2018, <b>54</b> , 4613.               |
| RuO <sub>2</sub> /NiO/NF              | NF                  | 10                         | 22          | 31.7                                | <i>Small</i> 2018, <b>14</b> , 1704073.                    |
| Ru@GnP                                | RRDE <sup>e)</sup>  | 10                         | 22          | 28                                  | <i>Adv. Mater.</i> 2018, <b>30</b> , 1803676.              |
| Ru NP/C                               | GCE                 | 50                         | 69          | 33                                  | <i>Adv. Energy Mater.</i> 2018, <b>8</b> , 1801698.        |
| RuCoP                                 | GCE                 | 10                         | 23          | 37                                  | <i>Energ. Environ. Sci.</i> 2018, <b>11</b> , 1819.        |
| Ru <sub>2</sub> P nanoparticles       | GCE                 | 10                         | 54          | 29.3                                | <i>Nat. Nanotechnol.</i> 2017, <b>12</b> , 441.            |
| RuP <sub>2</sub> @NPC                 | GCE                 | 10                         | 52          | 69                                  | <i>Angew. Chem., Int. Ed.</i> 2017, <b>56</b> , 11559.     |

<sup>a)</sup> Rotating disk electrode made of glassy carbon; <sup>b)</sup> Ni foam; <sup>c)</sup> Glassy carbon electrode; <sup>d)</sup> Carbon cloth; <sup>e)</sup> Rotating ring disk electrode made of glassy carbon.

**Table S5** The fitting data of the EIS measurements of the RuO<sub>2</sub>/Ru-CNFs-350 catalyst with other prepared control samples for HER.

| <b>Sample</b>                 | <b>R<sub>Ω</sub>(Ω)</b> | <b>R<sub>ct</sub> (Ω)</b> |
|-------------------------------|-------------------------|---------------------------|
| Ru-CNFs-15                    | 5.07                    | 5.49                      |
| RuO <sub>2</sub> /Ru-CNFs-300 | 5.14                    | 13.60                     |
| RuO <sub>2</sub> /Ru-CNFs-350 | 5.16                    | 3.26                      |
| RuO <sub>2</sub> /Ru-CNFs-400 | 4.88                    | 8.48                      |
| RuO <sub>2</sub> /Ru-CNFs-450 | 4.94                    | 14.09                     |

**Table S6** Comparison of some representative catalysts for overall water splitting properties in 1 M KOH.

| Electrolyzer<br>(Cathode  Anode)                                 | Substrate                       | Voltage@10<br>mA cm <sup>-2</sup> (V) | Reference                                                     |
|------------------------------------------------------------------|---------------------------------|---------------------------------------|---------------------------------------------------------------|
| RuO <sub>2</sub> /Ru-CNFs-350  <br>RuO <sub>2</sub> /Ru-CNFs-350 | Ni foam                         | 1.452                                 | This work                                                     |
| Commercial Pt/C  <br>Commercial RuO <sub>2</sub>                 | Ni foam                         | 1.560                                 | This work                                                     |
| Ru-CoV-LDH/NF  <br>Ru-CoV-LDH/NF                                 | Ni foam                         | 1.5                                   | <i>ChemSusChem</i><br>2021, <b>14</b> , 730.                  |
| (Ru-Co)O <sub>x</sub> /CC  <br>(Ru-Co)O <sub>x</sub> /CC         | Carbon cloth                    | 1.488                                 | <i>Angew. Chem. Int. Ed.</i><br>2020, <b>59</b> , 17219.      |
| RuTe <sub>2</sub> -400  RuTe <sub>2</sub> -400                   | Glassy carbon<br>electrode      | 1.57                                  | <i>Appl. Catal. B-Environ.</i><br>2020, <b>278</b> , 119281.  |
| Ru-NiFe-P  Ru-NiFe-P                                             | Ni foam                         | 1.47                                  | <i>Appl. Catal. B: Environ.</i><br>2020, <b>263</b> , 118324. |
| Ru-MnFeP/NF  <br>Ru-MnFeP/NF                                     | Ni foam                         | 1.47                                  | <i>Adv. Energy Mater.</i><br>2020, 2000814                    |
| Ru-NiCoP/NF  <br>Ru-NiCoP/NF                                     | Ni foam                         | 1.515                                 | <i>Appl. Catal. B-Environ.</i><br>2020, <b>279</b> , 119396.  |
| RuO <sub>2</sub> /F-graphene  <br>RuO <sub>2</sub> /F-graphene   | Glassy carbon<br>electrode      | 1.56                                  | <i>Inorg. Chem. Front.</i><br>2020, <b>7</b> , 2188.          |
| NiTe@RuO <sub>2</sub>   <br>NiTe@NiFe-LDH                        | Ni foam                         | 1.49                                  | <i>Appl. Catal. B-Environ.</i><br>2020, <b>272</b> , 118988.  |
| RuIrO <sub>x</sub>   RuIrO <sub>x</sub>                          | Carbon fiber<br>paper           | 1.47                                  | <i>Nat. Commun.</i><br>2019, <b>10</b> , 4875.                |
| 0.27-RuO <sub>2</sub> @C  <br>0.27-RuO <sub>2</sub> @C           | Rotating ring disk<br>electrode | 1.50                                  | <i>Nano Energy</i><br>2019, <b>55</b> , 49.                   |
| RuCu NSs/C-250 °C  <br>RuCu NSs/C-350 °C                         | Glassy carbon<br>electrode      | 1.49                                  | <i>Angew. Chem. Int. Ed.</i><br>2019, <b>58</b> , 13983.      |
| Ru/Cu-doped RuO <sub>2</sub>   <br>Ru/Cu-doped RuO <sub>2</sub>  | Glassy carbon<br>electrode      | 1.47                                  | <i>Small</i><br>2018, <b>14</b> , 1803009.                    |
| Ir NWs  RuO <sub>2</sub> NWs                                     | Glassy carbon<br>electrode      | 1.47                                  | <i>Adv. Funct. Mater.</i><br>2018, 1803722                    |
| RuO <sub>2</sub> /NiO/NF  <br>RuO <sub>2</sub> /NiO/NF           | Ni foam                         | 1.5                                   | <i>Small</i><br>2018, 1704073                                 |
| NiFeRu-LDH/NF  <br>NiFeRu-LDH/NF                                 | Ni foam                         | 1.52                                  | <i>Adv. Mater.</i><br>2018, 30.                               |



## References

- 1 S. Chen, H. Huang, P. Jiang, K. Yang, J. Diao, S. Gong, S. Liu, M. Huang, H. Wang and Q. Chen, Mn-doped RuO<sub>2</sub> nanocrystals as highly active electrocatalysts for enhanced oxygen evolution in acidic media, *ACS Catal.*, 2019, **10**, 1152.
- 2 J. D. Benck, Z. Chen, L. Y. Kuritzky, A. J. Forman and T. F. Jaramillo, Amorphous molybdenum sulfide catalysts for electrochemical hydrogen production: Insights into the origin of their catalytic activity, *ACS Catal.*, 2012, **2**, 1916.
- 3 B. Chen, X. He, F. Yin, H. Wang, D. J. Liu, R. Shi, J. Chen and H. Yin, MO-Co@N-doped carbon (M = Zn or Co): Vital roles of inactive Zn and highly efficient activity toward oxygen reduction/evolution reactions for rechargeable Zn–air battery, *Adv. Funct. Mater.*, 2017, **27**, 1700795.
- 4 C. C. McCrory, S. Jung, J. C. Peters and T. F. Jaramillo, Benchmarking heterogeneous electrocatalysts for the oxygen evolution reaction, *J. Am. Chem. Soc.*, 2013, **135**, 16977.
